# Supplementary material for: A General Heuristic for Production Planning Problems
Source: Atypon-hosted journal article supplement (doi:10.1287/ijoc.1030.0042), 2004-08-01
Supplement: ijoc.1030.0042-sm-pochet_and_van_vyve.pdf [file ijoc.1030.0042-sm-pochet_and_van_vyve.pdf]

# On-Line Suuplement to “A General Heuristic for Production Planning Problems”

Y. Pochet • M. Van Vyve

*Center of Operations Research and Econometrics (CORE) and Institut d'Administration et de Gestion (IAG), Université catholique de Louvain. 34, voie du Roman Pays. 1348 Louvain-la-Neuve, Belgium.*

*Center of Operations Research and Econometrics (CORE), Université catholique de Louvain. 34, voie du Roman Pays. 1348 Louvain-la-Neuve, Belgium.*

*pochet@core.ucl.ac.be • vanvyve@core.ucl.ac.be*

---

## Complete computational results

The five following tables report the complete computational results.

Table 8 gives the value of the solutions found by the different heuristics, while the Table 9 gives the times for the same runs. Both tables are organized as follows: the first column is the name of the problem, the second specifies by which cut generator the basic formulation has been tightened, and the remaining gives the value of the solution found or the time in seconds needed by the considered heursitic. For the branching heuristics, the values of the solution found are the best solution found at the time IPE had finished, while the time is the time needed to find a solution at least as good as that of IPE.

In Tables 10, 11 and 12 are presented the complete computational results for the network design problems. The three Tables are organized as follows: the first column contains the name of the instance, the next group of four columns gives the value of the solution found by the routine specified by the first three rows, and the last four do the same for the times needed. As for lotsizing problems, the 'time' of BBbound is the time needed to find a solution at least as good as the one of IPE. There was no solution found by BBbound for g150x1100, g200x740d and g200x740e (XPRESS formulation) due to sensitivity to the numerical zero tolerances. Also, no solutions has been found by IPE for r80x800 and p500x2988b (XPRESS formulation) due to the difficulty of some LP relaxation. Those entries are indicated by "no sol.". All other blank entries mean that the initial LP relaxation was integer and there was thus no need for heuristics.

|          |         | BBestim  | Bbbound | Bbdepth  | IPE      | RR       | SSR      | CMSB     | Relax&Fix |
|----------|---------|----------|---------|----------|----------|----------|----------|----------|-----------|
| pp08a    | basic   | 8160     | 7720    | 8160     | 8040     | 8150     | 8320     | 9120     | 7580      |
|          | XPRESS  | 7710     | 7690    | 7710     | 8020     | 8620     | 8840.03  | 9030.01  | 7870      |
|          | bc-prod | 7370     | 7370    | 7350     | 7790     | 8020     | 8120     | 8780     | 7460      |
| set1ch   | basic   | 60913    | 63236.5 | 60913    | 69945.75 | 63538.5  | 71295    | 88924.25 | 55977     |
|          | XPRESS  | 60761.8  | 58997.6 | 60761.8  | 60038    | 59157.3  | 61664.05 | 68801.56 | 55032     |
|          | bc-prod | 54672.5  | 54672.5 | 54672.5  | 55420.5  | 58119.75 | 59900.25 | 61556    | 54672.5   |
| tr6-15   | basic   | 40641    | no sol. | 39762    | 40248    | 42263    | 43308    | 46183    | 40567     |
|          | XPRESS  | 39798.2  | 40852   | 40096.2  | 38976    | 40359.24 | 43787.21 | 44741.1  | 39777.25  |
|          | bc-prod | 37801    | 38044   | 38502    | 39039    | 39154    | 40469    | 40469    | 37984     |
| tr6-30   | basic   | no sol.  | no sol. | no sol.  | 65632    | 69977    | 71594    | 78563    | 66059     |
|          | XPRESS  | 66754.2  | 65736   | 66754.2  | 63073    | 67939.37 | 69408.25 | 74126.13 | 63124.2   |
|          | bc-prod | 63298    | 63369   | 63446    | 64370    | 65224    | 66068    | 69097    | 62459     |
| tr12-15  | basic   | no sol.  | no sol. | no sol.  | 79352.1  | 88607    | 97233    | 101741   | 83649     |
|          | XPRESS  | no sol.  | 84186   | no sol.  | 79825.3  | 90101.16 | 100721.1 | 102688.1 | 80730.1   |
|          | bc-prod | no sol.  | 78117   | no sol.  | 78098    | 77615    | 77885    | 77885    | 74761.9   |
| tr12-30  | basic   | no sol.  | no sol. | no sol.  | 138650   | no sol.  | no sol.  | no sol.  | 142488    |
|          | XPRESS  | no sol.  | 144943  | no sol.  | 136883.3 | 150214.3 | 151459.3 | 161850.3 | 142087    |
|          | bc-prod | 132822   | 131384  | 132545   | 131988   | 136553   | 137290   | 142581   | 130957    |
| tr24-15  | basic   | no sol.  | no sol. | no sol.  | 144370   | 152342   | 157293   | 180928   | 146185    |
|          | XPRESS  | no sol.  | no sol. | no sol.  | 139593.6 | 160459.5 | 171061.4 | 174042.1 | 143541.1  |
|          | bc-prod | 136968   | 136820  | 137268   | 137153   | 139122   | 140363   | 143012   | 136636    |
| tr24-30  | basic   | no sol.  | no sol. | no sol.  | 303800   | 324084   | 336098   | 382422   | 309084    |
|          | XPRESS  | no sol.  | no sol. | no sol.  | 301778.5 | 342587.9 | 360611.6 | 382258.4 | no sol.   |
|          | bc-prod | 288550   | 288097  | 288768   | 290006   | 293423   | 294349   | 297891   | 288035    |
| A1C1S1   | basic   | 13599.3  | 13642.8 | 13728.1  | 13458.1  | 13467.7  | 13884.7  | 17314.6  | 13559.5   |
|          | XPRESS  | 13249.3  | 13609.5 | 13737.2  | 12969.2  | 13652    | 13737.9  | 15984    | no sol.   |
|          | bc-prod | 12159.1  | 12055   | 12128.6  | 12440.2  | 12973.6  | 13339.6  | 14322.3  | 12029.16  |
| A1C1S1en | basic   | 13597.9  | 13642.8 | 13726.6  | 13556.2  | 13408.3  | 13992.6  | 16965.6  | 13559     |
|          | XPRESS  | 13667.2  | 13929.1 | 13984.6  | 12722.4  | 14117    | 14303.2  | 16837.5  | no sol.   |
| A2C1S1   | basic   | 13802.2  | 13124.3 | 13705.9  | 12984    | 13144.8  | 13740.5  | 17102.6  | 12216     |
|          | XPRESS  | 13564.4  | 12558.8 | 13302.6  | 13014.1  | 14514.8  | 14514.8  | 18346.4  | no sol.   |
|          | bc-prod | 11280    | 11310.3 | 11695.2  | 11467.7  | 11834.9  | 11838.4  | 13915    | 10963.9   |
| A2C1S1en | basic   | 13973.4  | 13441.7 | 13705.9  | 13434.5  | 13882.3  | 14393.3  | 17055.3  | 12216     |
|          | XPRESS  | 12679.1  | 12779.9 | 13680.8  | 12862.7  | 14172.5  | 14172.5  | 17298.62 | no sol.   |
| B1C1S1   | basic   | 46815    | no sol. | no sol.  | 27089.1  | 27955.9  | 38119.6  | 61852.6  | 38800.41  |
|          | XPRESS  | no sol.  | no sol. | no sol.  | 29313.2  | 40787.1  | 40787.1  | 59436.2  | no sol.   |
|          | bc-prod | 25089.9  | 25396.9 | 28886    | 25497.2  | 29024.4  | 36779.1  | 48056    | 25395.72  |
| B1C1S1en | basic   | 46381.3  | no sol. | no sol.  | 29712.9  | 30596.2  | 48915.3  | 62957.2  | 38800.41  |
|          | XPRESS  | 39716.8  | no sol. | no sol.  | 29769.7  | 45371.2  | 45371.2  | 50015.2  | 28502.42  |
| B2C1S1   | basic   | 34327.7  | no sol. | no sol.  | 29225.6  | 30089.9  | 43707.2  | 59717    | 33591.7   |
|          | XPRESS  | no sol.  | no sol. | no sol.  | 32003.9  | 45348.9  | 45922.8  | 53295.5  | 32160.55  |
|          | bc-prod | 30964.5  | 30272.8 | 28689.8  | 31037.5  | 30868.3  | 33258.5  | 38994.6  | 27973.3   |
| B2C1S1en | basic   | 38052.1  | no sol. | no sol.  | 32774.9  | 33727.1  | 48568.9  | 59457.1  | 33540.22  |
|          | XPRESS  | 42937.3  | no sol. | no sol.  | 31668.5  | no sol.  | no sol.  | no sol.  | no sol.   |
| multia   | basic   | 8353     | 8454    | 8353     | 5219     | 4702     | 4702     | 5899     | 6597      |
|          | XPRESS  | 6277     | 6641    | 6277     | 5034     | 5050.03  | 5050.03  | 7862     | 4970      |
| multib   | basic   | 6004     | 5887    | 6004     | 4318     | 4203     | 4203     | 4318     | 4376      |
|          | XPRESS  | 4591     | 5013    | 4591     | 4447     | 3911.01  | 3911.01  | 4375.01  | 3788      |
| multic   | basic   | 6686     | 5934    | 6686     | 4255     | 3982     | 3982     | 4819     | 5066      |
|          | XPRESS  | 5281     | 5578    | 5281     | 4646     | 4330.03  | 4330.03  | 6244     | 4000      |
| multid   | basic   | 33830.8  | 13523   | 33830.8  | 12802.5  | 13037.76 | 13037.76 | 13420.25 | 13446     |
|          | XPRESS  | 13686.8  | 12876   | 13686.8  | 13463    | 12998.2  | 12998.2  | 13034.57 | 12907.6   |
|          | bc-prod | 18283.8  | 13438.1 | 18283.8  | 13348.5  | 202690   | 214085   | 214085   | 12875     |
| multie   | basic   | 49754.25 | 2625.5  | 49754.25 | 2625.5   | 2797.75  | 2797.75  | 2797.75  | 2625.5    |
|          | XPRESS  | 2701.36  | 2673    | 2701.4   | 2673     | 3407.09  | 4219.58  | 4219.58  | 2949.2    |
|          | bc-prod | 2761.75  | 2761.75 | 2761.75  | 2749.75  | 2992     | 2992     | 2992     | 2633.5    |
| multif   | basic   | 89076    | 1444    | 89076    | 1440     | 1473     | 1473     | 1484     | 1440      |
|          | XPRESS  | 3818.8   | 1473    | 3818.8   | 1440     | 1473     | 1473     | 1473     | 1440      |

Table 1: Lotsizing problems: value of the solutions

|          |         | Bbestim | Bbbound | Bbdepth | IPE    | RR      | SSR     | CMSB    | Relax&Fix |
|----------|---------|---------|---------|---------|--------|---------|---------|---------|-----------|
| pp08a    | basic   | 11      | 0.47    | 0.3     | 0.49   | 1.3     | 0.49    | 0.14    | 0.5       |
|          | XPRESS  | 0.5     | 0.4     | 0.5     | 0.48   | 1.47    | 0.73    | 0.32    | 8.6       |
|          | bc-prod | 0.3     | 0.5     | 0.6     | 0.74   | 1.57    | 0.91    | 0.47    | 0.9       |
| set1ch   | basic   | 1       | 2.5     | 1       | 0.84   | 9.09    | 2.56    | 0.28    | 0.91      |
|          | XPRESS  | 4.5     | 1.3     | 1       | 1.56   | 9.76    | 2.81    | 0.44    | 3.05      |
|          | bc-prod | 0.5     | 0.7     | 1.1     | 1.26   | 8.38    | 2.9     | 0.94    | 1.08      |
| tr6-15   | basic   | 0.7     | 8.5     | 1.2     | 1.06   | 2.13    | 1       | 0.17    | 0.66      |
|          | XPRESS  | 4.3     | 123     | 1       | 1.2    | 3.36    | 2.05    | 0.32    | 2.36      |
|          | bc-prod | 1       | 0.85    | 1       | 1.31   | 3.19    | 1.24    | 0.32    | 1.27      |
| tr6-30   | basic   | no sol. | 1.5     | no sol. | 2.54   | 5.12    | 2.55    | 0.28    | 1.81      |
|          | XPRESS  | no sol. | 1       | 1       | 2.76   | 7.24    | 2.99    | 0.31    | 4.54      |
|          | bc-prod | 1.1     | 1.8     | 1.5     | 1.7    | 9.56    | 3.6     | 0.59    | 3.92      |
| tr12-15  | basic   | no sol. | no sol. | no sol. | 2.49   | 7.32    | 3.66    | 0.22    | 1.46      |
|          | XPRESS  | no sol. | 181     | no sol. | 3.44   | 10.43   | 4.73    | 0.44    | 4.2       |
|          | bc-prod | no sol. | 5.5     | no sol. | 3.53   | 11.43   | 5.56    | 0.99    | 2.94      |
| tr12-30  | basic   | no sol. | no sol. | no sol. | 6.58   | no sol. | no sol. | no sol. | 4.09      |
|          | XPRESS  | no sol. | 216     | no sol. | 9.12   | 14.47   | 9.13    | 1.33    | 12.5      |
|          | bc-prod | 6.5     | 2.5     | 3.5     | 6.03   | 33.83   | 14.02   | 2.72    | 13.12     |
| tr24-15  | basic   | no sol. | no sol. | no sol. | 8.34   | 21.65   | 9.88    | 0.65    | 1.91      |
|          | XPRESS  | no sol. | no sol. | no sol. | 8.82   | 25.25   | 11.31   | 0.98    | 21.6      |
|          | bc-prod | 5.2     | 3       | 5.8     | 6.01   | 33.08   | 14.12   | 1.87    | 5.32      |
| tr24-30  | basic   | no sol. | no sol. | no sol. | 32.73  | 73.19   | 32.49   | 1.13    | 7.69      |
|          | XPRESS  | no sol. | no sol. | no sol. | 35.65  | 85.06   | 37.87   | 2.19    | no sol.   |
|          | bc-prod | 6.5     | 6.5     | 14      | 21.15  | 129.91  | 63.07   | 6.18    | 18.9      |
| A1C1S1   | basic   | 144     | 57      | 17      | 28.8   | 499     | 313.6   | 17.64   | 34.5      |
|          | XPRESS  | 279     | 263     | 13      | 52.2   | 648.1   | 419.3   | 11.81   | no sol.   |
|          | bc-prod | 38      | 39      | 65      | 201.5  | 1864.5  | 1141.5  | 56.8    | 197.73    |
| A1C1S1en | basic   | 35      | 64      | 20      | 31.5   | 496.5   | 360.1   | 19.92   | 38.8      |
|          | XPRESS  | 295     | 176     | 48      | 54     | 688.8   | 462.5   | 21.5    | no sol.   |
| A2C1S1   | basic   | 46      | 159     | 12      | 29.2   | 428     | 276.5   | 13.71   | 45.9      |
|          | XPRESS  | 32      | 16      | 9       | 40.2   | 456.2   | 289.4   | 14.46   | no sol.   |
|          | bc-prod | 87      | 106     | 189     | 190    | 1545.1  | 837.1   | 48.62   | 146.95    |
| A2C1S1en | basic   | 258     | 25      | 12      | 23.1   | 388     | 286.9   | 13.72   | 46.1      |
|          | XPRESS  | 37      | 18      | 13      | 49.8   | 851.9   | 693.9   | 17.88   | no sol.   |
| B1C1S1   | basic   | 296     | no sol. | no sol. | 22.9   | 713.8   | 418.2   | 17.36   | 42.68     |
|          | XPRESS  | no sol. | no sol. | no sol. | 65.6   | 1099.7  | 569.5   | 30.48   | no sol.   |
|          | bc-prod | 113     | 176     | 50      | 224.17 | 3377.8  | 1596.3  | 100.5   | 159       |
| B1C1S1en | basic   | 275     | no sol. | no sol. | 29.6   | 762.5   | 477.6   | 21.55   | 46.21     |
|          | XPRESS  | 93      | no sol. | no sol. | 49.6   | 1052.4  | 575.4   | 20.86   | 49.9      |
| B2C1S1   | basic   | 93      | no sol. | no sol. | 55     | 982.8   | 563.4   | 26.87   | 53.8      |
|          | XPRESS  | no sol. | no sol. | no sol. | 62.5   | 1565.5  | 916.2   | 35.11   | 76.31     |
|          | bc-prod | 86      | 78      | 97      | 296.9  | 3923.1  | 1984.7  | 106.88  | 228.4     |
| B2C1S1en | basic   | 49      | no sol. | no sol. | 32.9   | 1080.2  | 635.8   | 30.94   | 62.65     |
|          | XPRESS  | 220     | no sol. | no sol. | 58.4   | no sol. | no sol. | no sol. | no sol.   |
| multia   | basic   | 70      | 11      | 5       | 0.64   | 21.49   | 5.23    | 0.35    | 2.31      |
|          | XPRESS  | 64      | 83      | 3       | 0.83   | 39.49   | 5.71    | 0.69    | 8.33      |
| multib   | basic   | 17      | 155     | 6       | 0.47   | 27.45   | 6.97    | 0.5     | 2.31      |
|          | XPRESS  | 12      | 8       | 4       | 0.91   | 37.9    | 7.79    | 0.55    | 17.9      |
| multic   | basic   | 26      | 11      | 5       | 1.46   | 28.66   | 5.01    | 0.57    | 2.44      |
|          | XPRESS  | 9.5     | 38      | 4       | 0.93   | 40.42   | 6.18    | 0.79    | 23.36     |
| multid   | basic   | 16      | 28      | 8       | 0.85   | 73.92   | 24.61   | 0.49    | 9.41      |
|          | XPRESS  | 47      | 12      | 10      | 2.02   | 102.77  | 30.86   | 0.96    | 24.99     |
|          | bc-prod | 54      | 16      | 4       | 5.08   | 98.35   | 18.36   | 4.59    | 14.3      |
| multie   | basic   | 10      | 3       | 2       | 0.35   | 12.9    | 5.82    | 0.18    | 2.45      |
|          | XPRESS  | 5       | 1.7     | 2       | 0.67   | 25.96   | 7.47    | 0.54    | 4.65      |
|          | bc-prod | 2.1     | 2.5     | 1       | 1.6    | 23.96   | 6.41    | 0.75    | 4.97      |
| multif   | basic   | 7       | 2       | 1       | 0.3    | 6.76    | 2.66    | 0.13    | 1.62      |
|          | XPRESS  | 2.2     | 1       | 1       | 0.55   | 8.93    | 3.51    | 0.14    | 0.86      |

Table 2: Lotsizing problems: times

|            | Value   |        |         |        | Times   |        |         |        |
|------------|---------|--------|---------|--------|---------|--------|---------|--------|
|            | basic   |        | XPRESS  |        | basic   |        | XPRESS  |        |
|            | BBbound | IPE    | BBbound | IPE    | BBbound | IPE    | BBbound | IPE    |
| beasleyC1  | 92      | 102    | 87      | 124    | 0.5     | 4.66   | 39      | 11.91  |
| beasleyC2  | 167     | 171    | 167     | 193    | 1       | 8.11   | 1       | 9.92   |
| beasleyC3  | 825     | 814    | 864     | 887    | 160     | 7.34   | 5       | 11.83  |
| berlin     | 1542    | 1300   | 1906    | 1595   | >300    | 50.53  | >300    | 115.68 |
| brasil     | 20047   | 16569  | 25619   | 27352  | >300    | 281.25 | 51      | 115.57 |
| mc11       | 12351   | 13057  | 23009   | 12979  | 6       | 8.89   | >300    | 20.9   |
| mc7        | 3989    | 4353   | 4428    | 4267   | 6       | 11.16  | 63      | 19.01  |
| mc8        | 1656    | 1717   | 3170    | 1815   | 7       | 10.95  | >300    | 24.64  |
| beavma     | 410860  | 399425 | 383746  | 383285 | 161     | 0.46   | 0.5     | 0.37   |
| mttest4ma  | 60342   | 52768  | 53679   | 53127  | >300    | 2.04   | 22      | 4.18   |
| g150x1100  | 84407   | 79492  | no sol. | 88826  | >300    | 5.72   | no sol. | 141.05 |
| g150x1650  | 85250   | 74691  | 76023   | 82778  | >300    | 13.64  | 2       | 244.71 |
| k15x420    | 875     | 843    | 819     | 909    | 35      | 1.51   | 0.5     | 9.79   |
| k15x630    | 993     | 1037   | 936     | 947    | 1       | 2.34   | 0.5     | 2.93   |
| p50x576    | 20462   | 19727  | 19742   | 19627  | >300    | 1.86   | 3       | 2.93   |
| p50x864    | 20236   | 19776  | 19173   | 19007  | 51      | 2.41   | 1       | 0.81   |
| fixnet6    | 11012   | 4296   | 6316    | 4284   | >300    | 1.84   | 49      | 3.22   |
| g180x666   | 629603  | 638930 | 639783  | 633839 | 1       | 1.4    | >300    | 4.47   |
| g200x740c  | 681920  | 681972 | 681079  | 680624 | 0.7     | 0.73   | 18      | 1.34   |
| g200x740d  | 589241  | 589150 | no sol. | 586227 | 5       | 1.36   | no sol. | 2.09   |
| g200x740e  | 604423  | 604179 | no sol. | 600714 | >300    | 1.59   | no sol. | 4.24   |
| g55x188c   | 39085   | 36690  | 35464   | 35509  | >300    | 0.53   | 0.5     | 0.51   |
| h50x2450   | 437328  | 458026 | 553144  | 489175 | 1       | 24.61  | >300    | 44.04  |
| h50x2450b  | 56.09   | 53.8   | 68.22   | 67.27  | >300    | 21.2   | 153     | 44.96  |
| h50x2450c  | 3168    | 3184   | 3621    | 3497   | 1       | 53.24  | >300    | 129.06 |
| h50x2450e  | 3190    | 3194   | 3680    | 3843   | 36      | 51.48  | 1       | 128.74 |
| h80x6320   | 5087    | 4913   | 6134    | 5541   | >2000   | 414.13 | >3000   | 1787   |
| h80x6320b  | 4502    | 4293   | 4882    | 4811   | >2000   | 426.59 | >3000   | 1291   |
| h80x6320c  | 4755    | 4704   | 5281    | 5056   | >2000   | 409.65 | >3000   | 1250.1 |
| h80x6320d  | 5118    | 4796   | 5698    | 5433   | >2000   | 408.03 | >3000   | 1454.3 |
| k15x210    | 17820   | 18244  | 16128   | 16180  | 0.5     | 2.01   | 0.5     | 0.93   |
| k20x380b   | 11949   | 12337  |         |        | 1       | 3.37   |         |        |
| k20x380c   | 19374   | 18791  | 17159   | 22385  | 18      | 3.96   | 1       | 26.94  |
| k20x380d   | 22546   | 25977  | 20979   | 20979  | 0.5     | 3.71   | 1       | 1.39   |
| k20x380e   | 7377    | 7818   |         |        | 1       | 2.03   |         |        |
| p100x588c  | 173598  | 180220 | 172770  | 173742 | 3       | 6.43   | 0.5     | 7.86   |
| p100x588d  | 5       | 5      | 6       | 6      | 0.5     | 4.9    | 4       | 6.03   |
| p200x1188c | 15531   | 15747  | 15078   | 29037  | 0.5     | 12.42  | 0.5     | 48.02  |
| p500x2988c | 15215   | 15215  | 15323   | 15215  | 9       | 9.06   | 9       | 1.57   |
| p500x2988d | 6       | 6      | 6       | 10     | 2       | 53.74  | 0.5     | 219.8  |

Table 3: Uncapacitated single-source network design problems: results

|            | Value   |        |                |         | Times   |       |         |         |
|------------|---------|--------|----------------|---------|---------|-------|---------|---------|
|            | basic   |        | XPRESS         |         | basic   |       | XPRESS  |         |
|            | BBbound | IPE    | BBbound        | IPE     | BBbound | IPE   | BBbound | IPE     |
| g200x740   | 45301   | 46066  | 45022          | 44734   | 1       | 3.77  | 136     | 14.09   |
| g200x740b  | 183819  | 183253 | 182513         | 181256  | >300    | 1.9   | >300    | 8.11    |
| g200x740g  | 57121   | 49093  | 59279          | 48065   | >300    | 4.62  | >300    | 107.65  |
| g200x740h  | 137235  | 136966 | int infeasible | 134583  | 7       | 5.58  |         | 53.79   |
| g200x740i  | 43439   | 34002  | 44080          | 34343   | >300    | 4.05  | >300    | 100.27  |
| g40x132    | 27818   | 27588  | 27432          | 27484   | 3       | 0.8   | 1       | 1.89    |
| g50x170    | 31631   | 28765  | 30209          | 26072   | 20      | 0.94  | 52      | 0.88    |
| g55x188    | 29296   | 26808  | 27966          | 25327   | >300    | 0.87  | 46      | 1.83    |
| k10x90     | 576     | 589    | 579            | 582     | 0.1     | 0.97  | 0.5     | 0.61    |
| k14x182    | 8615    | 8491   | 8570           | 10465   | 37      | 3.83  | 0.3     | 10.5    |
| k14x182b   | 11260   | 11561  | 11064          | 12379   | 1       | 1.72  | 0.3     | 2.12    |
| k16x240    | 11028   | 11715  | 11655          | 14630   | 0.2     | 5.55  | 0.5     | 26.86   |
| k16x240b   | 12444   | 13552  | 13139          | 13564   | 0.2     | 5.46  | 4       | 27.73   |
| k20x380    | 2038    | 2177   | 2025           | 2695    | 0.1     | 4.95  | 0.5     | 36.55   |
| p200x1188  | 11716   | 12313  | 12023          | 12297   | 1       | 16.68 | 9       | 156.77  |
| p200x1188b | 70416   | 65363  | 65382          | 65777   | >300    | 15.67 | 47      | 233.65  |
| p500x2988  | 72267   | 72287  | 73200          | 72662   | 3       | 9.09  | >300    | 263.24  |
| p500x2988b | 192524  | 197333 |                | no sol. | 4       | 89.12 |         | no sol. |
| p50x288    | 6377    | 6522   | 6216           | 6447    | 0.1     | 2.4   | 1       | 5.2     |
| p50x288b   | 25389   | 23261  | 22440          | 23133   | >300    | 2.34  | 0.5     | 5.67    |
| p80x400    | 8796    | 8855   | 8939           | 8748    | 0.2     | 2.71  | >300    | 10.04   |
| p80x400b   | 45523   | 43387  | 42850          | 43685   | >300    | 3.66  | 14      | 15.33   |
| r20x100    | 17255   | 17335  | 16528          | 17205   | 1       | 1.51  | 1       | 1.52    |
| r20x200    | 15151   | 16934  | 17626          | 17523   | 0.2     | 4.38  | 13      | 10.95   |
| r30x160    | 24008   | 24244  | 24078          | 24127   | 1       | 1.69  | 1       | 2.31    |
| r50x360    | 1885    | 1803   | 1836           | 1914    | >300    | 3.42  | 13      | 72.07   |
| r80x800    | 5447    | 5645   |                | no sol. | 0.5     | 14.39 |         | no sol. |
| sp100x200  | 38503   | 35209  | 37356          | 34805   | >300    | 0.6   | 3       | 0.38    |
| sp150x300  | 32289   | 30918  | 34766          | 33178   | >300    | 0.75  | 6       | 1.35    |
| sp150x300b | 58      | 60     | 58             | 60      | 0.5     | 1.44  | 0.5     | 2.56    |
| sp150x300c | 585371  | 590384 | 579970         | 572297  | 0.5     | 0.6   | 2       | 0.66    |
| sp150x300d | 69      | 71     | 72             | 71      | 0.5     | 0.98  | 4       | 1.6     |
| sp50x100   | 51129   | 51489  | 50968          | 50968   | 0.3     | 0.33  |         |         |
| sp80x160   | 20245   | 22124  | 19549          | 19549   | 0.3     | 0.42  | 0.21    | 0.21    |
| sp90x180   | 70588   | 69236  | 69798          | 68862   | >300    | 0.86  | 1       | 0.33    |
| sp90x250   | 28867   | 23844  | 23571          | 23571   | >300    | 0.72  | 0.23    | 0.23    |

Table 4: Uncapacitated multi-source network design problems: results

|            | Value   |       |         |       | Times   |      |         |       |
|------------|---------|-------|---------|-------|---------|------|---------|-------|
|            | basic   |       | XPRESS  |       | basic   |      | XPRESS  |       |
|            | BBbound | IPE   | BBbound | IPE   | BBbound | IPE  | BBbound | IPE   |
| g200x740j  | 50637   | 48256 | 47613   | 47944 | >300    | 2.98 | 14      | 22.96 |
| g55x188d   | 35551   | 30699 | 29407   | 30215 | 134     | 0.56 | 1       | 1.42  |
| k14x182c   | 21379   | 21103 | 19590   | 20718 | 3       | 1.76 | 1       | 3.72  |
| k16x240c   | 17727   | 16284 | 14794   | 18496 | 91      | 1.41 | 3       | 9.74  |
| p500x2988e | 1E+09   | 72016 | 74261   | 72152 | >300    | 6.66 | >300    | 27.65 |
| p50x288c   | 10497   | 10356 | 9844    | 10040 | 3       | 1.31 | 1       | 2.42  |
| p80x400b   | 27928   | 23618 | 23519   | 23311 | >300    | 2.07 | 5       | 2.41  |
| r50x360b   | 2267    | 1879  | 1852    | 1872  | >300    | 1.65 | 6       | 11.34 |

Table 5: Capacitated network design problems: results
